# Supplementary material
Source: publisher figshare collection journal article supplement (https://gsajournals.figshare.com/articles/dataset/_/8945048)
Supplement: Supplementary file 1 [file 1]

## Sheet: Folha1
Supplementary file 1. List of species used for phylome analysis, and respective proteome ID, and number of proteins. * - proteomes annotated in this study
Species	Proteome ID	Number of proteins
Eremothecium gossypii	ASHGO.6	4749
Komagataella pastoris	PICPA.2	5072
Candida albicans	CANAL.6	5139
Ogataea angusta	PICAN.1	5145
Pichia kudriavzevii	ISSOR.5	5158
Lachancea thermotolerans	LACTH.2	5169
Candida glabrata	CANGA.6	5188
Candida bracarensis	273131.2	5247
Candida auris	498019.2	5391
Yamadazyma tenuis	CANTE.1	5527
Brettanomyces bruxellensis	DEKBR.3	5590
Candida orthopsilosis	CANO9.1	5676
Candida parapsilosis	CANPA.2	5784
Scheffersomyces stipitis	PICST.3	5797
Candida dubliniensis	CANDC.1	5819
Diutina rugosa*	5481-01-01	5821
Saccharomyces cerevisiae	YEAST.9	5825
Meyerozyma guilliermondii	PICGU.1	5919
Candida intermedia	45354.1	5921
Clavispora lusitaniae	CLALS.1	5937
Candida metapsilosis	273372.1	5960
Kuraishia capsulata	317047.2	6027
Blastobotrys adeninivorans	BLAAD.2	6118
Candida tropicalis	CANTR.1	6230
Debaryomyces hansenii	DEBHA.5	6264
Yarrowia lipolytica	YARLI.5	6472
Trichomonascus ciferrii*	44093.1	6913
Aspergillus fumigatus	ASPFU.4	9630
