# Supplementary material
Source: publisher figshare collection journal article supplement (https://gsajournals.figshare.com/articles/dataset/_/8945048)
Supplement: Supplementary file 1 [file 1]

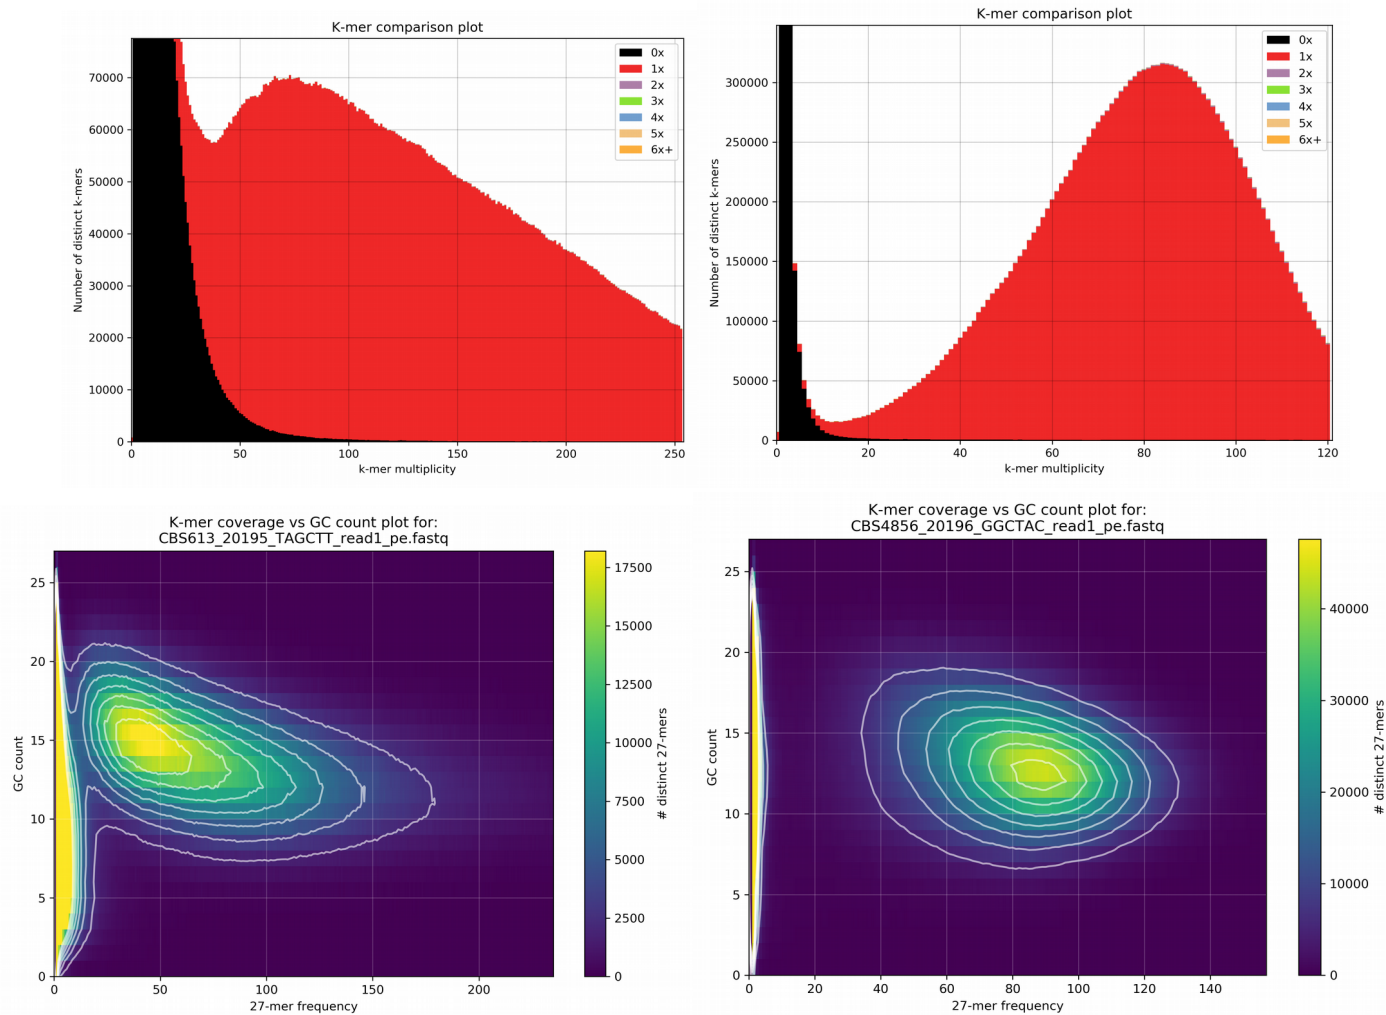

**Supplementary Figure 1. K-mer frequency analysis of *D. rugosa* (right) and *T. ciferrii* (left) sequencing reads. a) Comparison of their 27-mers with the respective genome assembly, with 27-mers present in the assembly marked in red, and 27-mers absent from the assembly marked in black. b) GC content analysis of 27-mers.**
